# Supplementary material for: Extracellular vesicles from equine mesenchymal stem cells decrease inflammation markers in chondrocytes in vitro
Source: PubMed Central journal article supplement (PMC9787580; doi:10.1111/evj.13537), 2021-11-24

**Figure S1:** Analysis of pro-inflammatory cytokines on chondrocytes proliferation. Cell counts shown are the average of three technical replicates (n=3)  $\pm$  SD. No statistical difference was found among treatments.

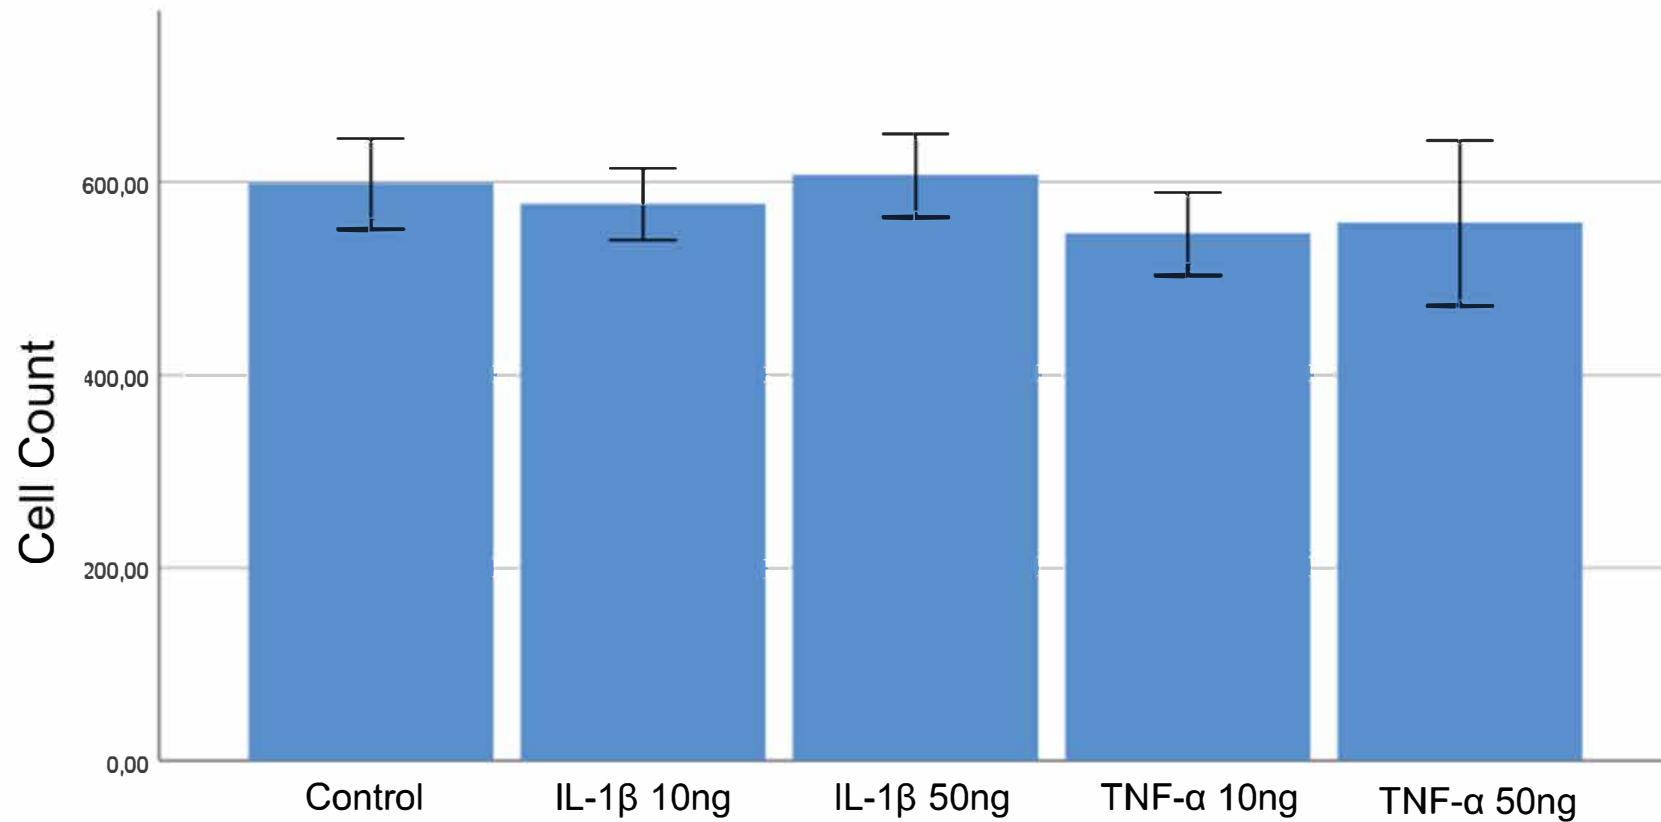

Supplement: EVJ-54-1133-s001.pdf [file EVJ-54-1133-s001.pdf]
